# Supplementary material for: Biological Activity of Essential Oils of Four Juniper Species and Their Potential as Biopesticides
Source: MDPI journal article supplement (doi:10.3390/molecules26216358), 2021-10-21
Supplement: s1 [file s1]

**Table S1**

Constituents and concentrations of *J. communis* extracted using the Clevenger and Commercial extraction methods.

| Constituent Number | Volatile constituents  | RI   | Concentration min-max range (%)<br>Clevenger | Concentration min-max range (%)<br>Commercial |
|--------------------|------------------------|------|----------------------------------------------|-----------------------------------------------|
| 1                  | $\alpha$ -Thujene      | 931  | 0.98 - 1.48                                  | 1.01 - 1.55                                   |
| 2                  | $\alpha$ -Pinene       | 939  | 26.81 - 35.59                                | 26.48 - 35.34                                 |
| 3                  | Camphene               | 953  | 0.29 - 0.31                                  | 0.30 - 0.33                                   |
| 4                  | Sabinene               | 969  | 8.94 - 9.41                                  | 9.16 - 9.89                                   |
| 5                  | $\beta$ -Pinene        | 974  | 1.63 - 1.71                                  | 1.67 - 1.80                                   |
| 6                  | $\beta$ -Myrcene       | 991  | 4.27 - 4.49                                  | 4.37 - 4.72                                   |
| 7                  | $\beta$ -Fellandrene   | 1005 | 0.11 - 0.61                                  | 0.12 - 0.64                                   |
| 8                  | $\alpha$ -Terpinene    | 1018 | 0.8 - 0.84                                   | 0.82 - 0.88                                   |
| 9                  | p-Cymene               | 1025 | 0.88 - 0.92                                  | 0.90 - 0.97                                   |
| 10                 | Limonene               | 1031 | 2.07 - 6.96                                  | 2.12 - 7.31                                   |
| 11                 | $\gamma$ -Terpinene    | 1062 | 1.42 - 1.47                                  | 1.45 - 1.54                                   |
| 12                 | $\alpha$ -Terpinolene  | 1088 | 0.92 - 1.09                                  | 0.95 - 1.15                                   |
| 13                 | $\beta$ -Linalool      | 1096 | 0.81 - 1.00                                  | 0.83 - 1.06                                   |
| 14                 | Terpinene-4-ol         | 1177 | 3.83 - 4.97                                  | 3.93 - 5.22                                   |
| 15                 | p-Cymene-8-ol          | 1182 | 0.18 - 0.85                                  | 0.19 - 0.89                                   |
| 16                 | $\alpha$ -Terpineol    | 1189 | 0.71 - 0.74                                  | 0.72 - 0.78                                   |
| 17                 | Bornyl acetate         | 1285 | 0.31 - 0.64                                  | 0.31 - 0.67                                   |
| 18                 | $\alpha$ -Cubebene     | 1351 | 0.28 - 0.92                                  | 0.29 - 0.97                                   |
| 19                 | $\alpha$ -Copaene      | 1376 | 0.49 - 0.66                                  | 0.50 - 0.69                                   |
| 20                 | $\beta$ -Elemene       | 1390 | 0.32 - 1.11                                  | 0.33 - 1.17                                   |
| 21                 | $\beta$ -Caryophyllene | 1419 | 2.33 - 3.56                                  | 2.39 - 3.74                                   |
| 22                 | $\gamma$ -Elemene      | 1433 | 0.19 - 0.37                                  | 0.20 - 0.39                                   |
| 23                 | $\alpha$ -Humulene     | 1454 | 1.29 - 2.63                                  | 1.32 - 2.76                                   |
| 24                 | $\gamma$ -Muurolene    | 1479 | 0.45 - 0.21                                  | 0.21 - 0.48                                   |
| 25                 | Germacrene D           | 1480 | 7.27 - 8.57                                  | 6.45 - 6.95                                   |
| 26                 | Elixene                | 1493 | 0.92 - 3.29                                  | 0.94 - 3.45                                   |
| 27                 | $\gamma$ -Cadinene     | 1513 | 1.51 - 1.55                                  | 1.55 - 1.63                                   |
| 28                 | $\delta$ -Cadinene     | 1524 | 4.49 - 6.10                                  | 4.12 - 6.41                                   |
| 29                 | (-)-Spathulenol        | 1578 | 1.00 - 2.06                                  | 1.03 - 2.16                                   |
| 30                 | Caryophyllene oxide    | 1582 | 2.42 - 2.54                                  | 2.25 - 2.64                                   |
| 31                 | $\delta$ -Cadinol      | 1619 | n.d.                                         | 0.96 - 1.08                                   |
| 32                 | tau.-Cadinol           | 1634 | n.d.                                         | 0.48 - 0.75                                   |
| 33                 | tau.-Muurolol          | 1638 | n.d.                                         | 0.33 - 0.67                                   |
| 34                 | $\alpha$ -Cadinol      | 1641 | n.d.                                         | 0.73 - 0.95                                   |
| 35                 | Manoyl oxide           | 1992 | 0.63 - 3.52                                  | 0.65 - 3.70                                   |

n.d. = not detected.

**Table S2**

Constituents and concentrations of *J. sibirica* extracted using the Clevenger and Commercial extraction methods.

| Constituent Number | Volatile constituents      | RI   | Concentration min-max range (%)<br>Clevenger | Concentration min-max range (%)<br>Commercial |
|--------------------|----------------------------|------|----------------------------------------------|-----------------------------------------------|
| 1                  | $\alpha$ -Thujene          | 931  | 1.29 - 1.36                                  | 1.32 - 1.42                                   |
| 2                  | $\alpha$ -Pinene           | 939  | 15.38 - 20.51                                | 14.69 - 20.38                                 |
| 3                  | Camphene                   | 953  | 0.14 - 0.17                                  | 0.14 - 0.17                                   |
| 4                  | Sabinene                   | 969  | 13.25 - 14.91                                | 13.52 - 15.56                                 |
| 5                  | $\beta$ -Pinene            | 974  | 0.57 - 0.66                                  | 0.58 - 0.69                                   |
| 6                  | $\beta$ -Myrcene           | 991  | 1.03 - 1.16                                  | 1.05 - 1.21                                   |
| 7                  | $\delta$ -2-Carene         | 1001 | 0.79 - 1.26                                  | 0.81 - 1.32                                   |
| 8                  | $\delta$ -3-Carene         | 1007 | 0.55 - 1.82                                  | 0.56 - 1.90                                   |
| 9                  | $\alpha$ -Terpinene        | 1018 | 0.15 - 0.61                                  | 0.15 - 0.63                                   |
| 10                 | p-Cymene                   | 1025 | 0.49 - 0.61                                  | 0.50 - 0.64                                   |
| 11                 | Limonene                   | 1031 | 1.20 - 1.23                                  | 1.23 - 1.28                                   |
| 12                 | $\beta$ -Phelandrene       | 1033 | 0.17 - 0.53                                  | 0.17 - 0.56                                   |
| 13                 | trans- $\beta$ -Ocimene    | 1050 | 0.34 - 0.69                                  | 0.35 - 0.72                                   |
| 14                 | $\gamma$ -Terpinene        | 1062 | 1.11 - 1.23                                  | 1.13 - 1.28                                   |
| 15                 | $\alpha$ -Terpinolene      | 1088 | 1.18 - 1.33                                  | 1.20 - 1.39                                   |
| 16                 | Terpinene-4-ol             | 1177 | 3.41 - 3.54                                  | 3.48 - 3.70                                   |
| 17                 | Bornyl acetate             | 1285 | 0.33 - 0.42                                  | 0.33 - 0.44                                   |
| 18                 | Myrtenyl acetate           | 1298 | 0.26 - 0.28                                  | 0.26 - 0.29                                   |
| 19                 | $\alpha$ -Terpinyl acetate | 1337 | 0.30 - 0.39                                  | 0.31 - 0.40                                   |
| 20                 | $\alpha$ -Copaene          | 1378 | 1.08 - 4.23                                  | 1.10 - 4.41                                   |
| 21                 | $\beta$ -Elemene           | 1390 | 1.02 - 6.59                                  | 1.04 - 6.88                                   |
| 22                 | $\beta$ -Caryophyllene     | 1419 | 1.02 - 1.22                                  | 1.04 - 1.25                                   |
| 23                 | $\gamma$ -Elemene          | 1433 | 0.61 - 5.67                                  | 0.62 - 5.92                                   |
| 24                 | $\alpha$ -Humulene         | 1454 | 1.13 - 1.33                                  | 1.15 - 1.39                                   |
| 25                 | Germacrene D               | 1480 | 9.75 - 13.65                                 | 8.94 - 13.22                                  |
| 26                 | Elixene                    | 1493 | 0.61 - 1.84                                  | 0.62 - 1.92                                   |
| 27                 | $\alpha$ -Muurolene        | 1495 | 0.55 - 0.78                                  | 0.56 - 0.82                                   |
| 28                 | $\gamma$ -Cadinene         | 1513 | 0.49 - 1.28                                  | 0.50 - 1.33                                   |
| 29                 | $\delta$ -Cadinene         | 1524 | 5.80 - 6.45                                  | 5.91 - 6.73                                   |
| 30                 | $\alpha$ -Cadinene         | 1538 | 0.74 - 0.84                                  | 0.76 - 0.88                                   |
| 31                 | Germacrene B               | 1556 | 0.33 - 0.52                                  | 0.34 - 0.54                                   |
| 32                 | trans-Nerolidol            | 1561 | 1.95 - 3.99                                  | 1.98 - 4.17                                   |
| 33                 | Germacrene D-4-ol          | 1575 | 1.90 - 7.68                                  | 1.93 - 8.02                                   |
| 34                 | $\delta$ -Cadinol          | 1619 | 0.73 - 0.92                                  | 0.75 - 0.96                                   |
| 35                 | tau.-Cadinol               | 1634 | 0.57 - 1.13                                  | 0.58 - 1.18                                   |
| 36                 | tau.-Muurolol              | 1638 | 1.25 - 1.33                                  | 1.28 - 1.36                                   |
| 37                 | $\alpha$ -Cadinol          | 1641 | 1.44 - 2.85                                  | 1.46 - 2.98                                   |
| 38                 | Farnesol                   | 1692 | 0.38 - 0.79                                  | 0.39 - 0.83                                   |
| 39                 | Farnesal                   | 1707 | 0.24 - 0.35                                  | 0.25 - 0.37                                   |
| 40                 | Cembrene                   | 1931 | 1.19 - 1.22                                  | 1.21 - 1.27                                   |
| 41                 | Totarol                    | 2269 | 0.47 - 0.54                                  | 0.48 - 0.56                                   |

**Table S3**

Constituents and concentrations of *J. pygmaea* extracted using the Clevenger and Commercial extraction methods.

| Constituent Number | Volatile constituents  | RI   | Concentration min-max range (%)<br>Clevenger | Concentration min-max range (%)<br>Commercial |
|--------------------|------------------------|------|----------------------------------------------|-----------------------------------------------|
| 1                  | $\alpha$ -Thujene      | 931  | 1.29 - 2.64                                  | 1.31 - 2.69                                   |
| 2                  | $\alpha$ -Pinene       | 939  | 20.99 - 22.18                                | 19.41 - 22.14                                 |
| 3                  | Camphene               | 953  | 0.17 - 0.19                                  | 0.18 - 0.20                                   |
| 4                  | Sabinene               | 969  | 15.62 - 25.26                                | 14.94 - 25.36                                 |
| 5                  | $\beta$ -Pinene        | 974  | 2.24 - 4.4                                   | 2.28 - 4.59                                   |
| 6                  | $\beta$ -Myrcene       | 991  | 1.02 - 1.50                                  | 1.04 - 1.57                                   |
| 7                  | $\alpha$ -Phelandrene  | 1005 | 0.41 - 0.77                                  | 0.42 - 0.80                                   |
| 8                  | $\delta$ -3-Carene     | 1007 | 0.14 - 0.17                                  | 0.14 - 0.18                                   |
| 9                  | $\alpha$ -Terpinene    | 1018 | 0.83 - 1.53                                  | 0.85 - 1.59                                   |
| 10                 | p-Cymene               | 1025 | 0.96 - 1.24                                  | 0.97 - 1.30                                   |
| 11                 | Limonene               | 1031 | 1.43 - 2.08                                  | 1.46 - 2.18                                   |
| 12                 | $\beta$ -Phelandrene   | 1033 | 2.68 - 4.95                                  | 2.73 - 5.17                                   |
| 13                 | $\gamma$ -Terpinene    | 1062 | 1.52 - 2.67                                  | 1.55 - 2.79                                   |
| 14                 | cis-Sabinene hydrate   | 1068 | 0.12 - 0.16                                  | 0.13 - 0.17                                   |
| 15                 | $\alpha$ -Terpinolene  | 1088 | 1.04 - 1.86                                  | 1.06 - 1.94                                   |
| 16                 | $\beta$ -Linalool      | 1096 | 0.40 - 0.45                                  | 0.41 - 0.47                                   |
| 17                 | trans-Sabinene hydrate | 1098 | 0.20 - 0.22                                  | 0.21 - 0.23                                   |
| 18                 | Borneol                | 1169 | 0.31 - 0.37                                  | 0.32 - 0.38                                   |
| 19                 | Terpinene-4-ol         | 1177 | 3.19 - 5.83                                  | 3.05 - 6.09                                   |
| 20                 | $\alpha$ -Terpineol    | 1189 | 0.40 - 0.60                                  | 0.41 - 0.63                                   |
| 21                 | Myrtenol               | 1198 | 0.21 - 0.25                                  | 0.22 - 0.27                                   |
| 22                 | trans-Carveol          | 1219 | 0.19 - 0.24                                  | 0.20 - 0.25                                   |
| 23                 | Citronellol            | 1227 | 0.23 - 0.26                                  | 0.23 - 0.28                                   |
| 24                 | Bornyl acetate         | 1285 | 0.36 - 0.42                                  | 0.37 - 0.44                                   |
| 25                 | Myrtenyl acetate       | 1298 | 0.28 - 0.36                                  | 0.28 - 0.37                                   |
| 26                 | $\alpha$ -Copaene      | 1376 | 0.30 - 0.51                                  | 0.31 - 0.53                                   |
| 27                 | $\beta$ -Elemene       | 1390 | 1.07 - 4.62                                  | 1.09 - 4.83                                   |
| 28                 | $\beta$ -Caryophyllene | 1419 | 0.90 - 3.09                                  | 0.92 - 3.22                                   |
| 29                 | $\alpha$ -Humulene     | 1454 | 0.52 - 2.89                                  | 0.53 - 3.01                                   |
| 30                 | $\gamma$ -Muurolene    | 1479 | 0.32 - 1.36                                  | 0.33 - 1.42                                   |
| 31                 | Germacrene D           | 1480 | 2.43 - 11.06                                 | 2.48 - 11.55                                  |
| 32                 | Elixene                | 1493 | 0.70 - 1.41                                  | 0.72 - 1.47                                   |
| 33                 | $\gamma$ -Cadinene     | 1513 | 1.40 - 3.13                                  | 1.43 - 3.27                                   |
| 34                 | $\delta$ -Cadinene     | 1524 | 2.03 - 5.01                                  | 2.08 - 5.23                                   |
| 35                 | trans-Nerolidol        | 1561 | 0.61 - 2.52                                  | 0.62 - 2.63                                   |
| 36                 | Germacrene D-4-ol      | 1575 | 0.16 - 1.38                                  | 0.16 - 1.44                                   |
| 37                 | (-)-Spathulenol        | 1578 | 0.43 - 1.00                                  | 0.44 - 1.05                                   |
| 38                 | Caryophyllene oxide    | 1582 | 1.06 - 2.82                                  | 1.08 - 2.94                                   |
| 39                 | $\delta$ -Cadinol      | 1619 | 0.24 - 0.49                                  | 0.25 - 0.51                                   |
| 40                 | tau.-Cadinol           | 1634 | 0.21 - 0.61                                  | 0.21 - 0.63                                   |
| 41                 | $\alpha$ -Cadinol      | 1641 | 1.77 - 2.71                                  | 1.45 - 2.83                                   |

**Table S4**

Constituents and concentrations of *J. oxycedrus* extracted using the Clevenger and Commercial extraction methods.

| Constituent Number | Volatile constituents  | RI   | Concentration min-max range (%)<br>Clevenger | Concentration min-max range (%)<br>Commercial |
|--------------------|------------------------|------|----------------------------------------------|-----------------------------------------------|
| 1                  | Tricyclene             | 922  | 0.15 - 0.17                                  | 0.15 - 0.18                                   |
| 2                  | $\alpha$ -Pinene       | 939  | 27.84 - 33.79                                | 26.53 - 32.74                                 |
| 3                  | Camphene               | 953  | 0.24 - 0.25                                  | 0.25 - 0.27                                   |
| 4                  | Sabinene               | 969  | 0.93 - 1.51                                  | 0.95 - 1.60                                   |
| 5                  | $\beta$ -Pinene        | 974  | 0.44 - 3.81                                  | 0.45 - 4.04                                   |
| 6                  | $\beta$ -Myrcene       | 991  | 0.39 - 3.07                                  | 0.40 - 3.26                                   |
| 7                  | $\alpha$ -Terpinene    | 1018 | 0.19 - 0.33                                  | 0.13 - 0.35                                   |
| 8                  | p-Cymene               | 1025 | 0.27 - 1.31                                  | 0.27 - 1.39                                   |
| 9                  | Limonene               | 1031 | 2.99 - 4.79                                  | 3.06 - 5.09                                   |
| 10                 | $\gamma$ -Terpinene    | 1062 | 0.49 - 0.51                                  | 0.50 - 0.54                                   |
| 11                 | $\alpha$ -Terpinolene  | 1088 | 0.47 - 0.50                                  | 0.48 - 0.53                                   |
| 12                 | $\beta$ -Linalool      | 1096 | 0.36 - 0.38                                  | 0.37 - 0.41                                   |
| 13                 | $\alpha$ -Campholenal  | 1121 | 1.57 - 1.65                                  | 1.61 - 1.75                                   |
| 14                 | trans-Pinocarveol      | 1136 | 0.20 - 0.21                                  | 0.21 - 0.23                                   |
| 15                 | trans-Verbenol         | 1141 | 0.28 - 0.29                                  | 0.28 - 0.31                                   |
| 16                 | Borneol                | 1169 | 0.17 - 0.18                                  | 0.17 - 0.19                                   |
| 17                 | Terpinene-4-ol         | 1177 | 0.31 - 0.33                                  | 0.32 - 0.35                                   |
| 18                 | p-Cymene-8-ol          | 1182 | 0.42 - 0.44                                  | 0.43 - 0.47                                   |
| 19                 | Myrtenal               | 1185 | 0.70 - 0.73                                  | 0.71 - 0.78                                   |
| 20                 | Myrtenol               | 1187 | 0.66 - 0.70                                  | 0.68 - 0.74                                   |
| 21                 | $\alpha$ -Terpineol    | 1189 | 0.76 - 0.80                                  | 0.78 - 0.85                                   |
| 22                 | Verbenone              | 1208 | 0.44 - 0.46                                  | 0.45 - 0.49                                   |
| 23                 | Bornyl acetate         | 1285 | 0.63 - 0.66                                  | 0.65 - 0.70                                   |
| 24                 | Myrtenyl acetate       | 1298 | 0.56 - 0.59                                  | 0.57 - 0.62                                   |
| 25                 | $\alpha$ -Copaene      | 1376 | 0.78 - 0.82                                  | 0.79 - 0.87                                   |
| 26                 | $\beta$ -Elemene       | 1390 | 0.87 - 0.91                                  | 0.89 - 0.97                                   |
| 27                 | $\beta$ -Caryophyllene | 1419 | 0.97 - 2.02                                  | 0.99 - 2.15                                   |
| 28                 | $\gamma$ -Elemene      | 1433 | 0.51 - 0.71                                  | 0.53 - 0.76                                   |
| 29                 | $\alpha$ -Humulene     | 1454 | 0.33 - 1.41                                  | 0.34 - 1.50                                   |
| 30                 | $\alpha$ -Curcumene    | 1477 | 0.89 - 3.30                                  | 0.91 - 3.50                                   |
| 31                 | Germacrene D           | 1480 | 3.52 - 17.02                                 | 3.60 - 18.06                                  |
| 32                 | $\alpha$ -Muurolene    | 1499 | 0.25 - 0.48                                  | 0.26 - 0.51                                   |
| 33                 | $\gamma$ -Cadinene     | 1513 | 3.87 - 4.24                                  | 3.89 - 4.10                                   |
| 34                 | $\delta$ -Cadinene     | 1524 | 3.04 - 4.17                                  | 2.93 - 4.42                                   |
| 35                 | $\alpha$ -Cadinene     | 1537 | 0.18 - 0.68                                  | 0.18 - 0.72                                   |
| 36                 | $\alpha$ -Calacorene   | 1549 | 0.92 - 1.92                                  | 0.94 - 2.04                                   |
| 37                 | trans-Nerolidol        | 1561 | 0.81 - 3.81                                  | 0.83 - 4.04                                   |
| 38                 | (-)-Spathulenol        | 1578 | 0.53 - 0.95                                  | 0.54 - 0.97                                   |
| 39                 | Caryophyllene oxide    | 1582 | 0.77 - 0.87                                  | 0.79 - 0.93                                   |
| 40                 | $\alpha$ -Cedrol       | 1598 | 0.41 - 0.87                                  | 0.42 - 0.92                                   |
| 41                 | $\delta$ -Cadinol      | 1619 | 0.76 - 0.93                                  | 0.77 - 0.96                                   |
| 42                 | tau.-Cadinol           | 1634 | 0.80 - 1.50                                  | 0.82 - 1.59                                   |
| 43                 | tau.-Muurolol          | 1638 | 0.81 - 0.91                                  | 0.83 - 0.97                                   |
| 44                 | $\alpha$ -Cadinol      | 1641 | 0.63 - 0.76                                  | 0.64 - 0.80                                   |
| 45                 | Manoyl oxide           | 1992 | 4.03 - 20.18                                 | 4.13 - 21.41                                  |

**Table S5**

Main class of compounds in the essential oil (EO) of *J. oxycedrus*, *J. communis*, *J. pygmaea*, *J. sibirica*.

| Species/<br>Method/Sex |   | Class        |      |      |      |      |      |                |       |      |       |      |      |            |       |
|------------------------|---|--------------|------|------|------|------|------|----------------|-------|------|-------|------|------|------------|-------|
|                        |   | Monoterpenes |      |      |      |      |      | Sesquiterpenes |       |      |       |      |      | Diterpenes |       |
|                        |   | MH           | BOM  | OM   | BM   | PhM  | MOM  | SH             | OS    | TOS  | BSH   | OBS  | ASH  | MD         | OD    |
| <i>J. communis</i>     |   |              |      |      |      |      |      |                |       |      |       |      |      |            |       |
| ClevA                  | F | 58.5         | -    | 8.19 | -    | 0.92 | -    | 12.47          | -     | 2.06 | 10.07 | 2.42 | -    | -          | 0.63  |
|                        | M | 53.6         | -    | 5.84 | -    | 0.88 | -    | 11.90          | -     | 1.01 | 14.06 | 2.54 | -    | -          | 3.52  |
| SCom                   | F | 58.0         | -    | 8.40 | -    | 0.94 | -    | 11.78          | -     | 2.10 | 10.32 | 4.98 | -    | -          | 0.65  |
|                        | M | 54.0         | -    | 5.98 | -    | 0.89 | -    | 10.02          | -     | 1.03 | 14.41 | 5.96 | -    | -          | 3.61  |
| <i>J. oxycedrus</i>    |   |              |      |      |      |      |      |                |       |      |       |      |      |            |       |
| ClevA                  | M | 36.4         | 3.60 | 3.37 | -    | 1.31 | -    | 9.05           | -     | 1.81 | 15.47 | 4.87 | -    | -          | 20.18 |
|                        | F | 46.1         | 3.42 | 3.21 | -    | 0.26 | -    | 20.27          | -     | 0.94 | 13.62 | 3.87 | -    | -          | 4.03  |
| SCom                   | M | 35.3         | 3.69 | 3.46 | -    | 1.35 | -    | 9.28           | -     | 1.86 | 15.38 | 4.99 | -    | -          | 20.69 |
|                        | F | 44.3         | 3.51 | 3.28 | -    | 0.27 | -    | 20.78          | -     | 0.96 | 13.96 | 3.97 | -    | -          | 4.13  |
| <i>J. sibirica</i>     |   |              |      |      |      |      |      |                |       |      |       |      |      |            |       |
| ClevA                  | M | 43.6         | 0.70 | 3.41 | 1.33 | 0.61 | 5.63 | 20.45          | 3.84  | -    | 10.68 | 4.03 | 0.62 | 1.22       | -     |
|                        | F | 36.6         | 0.58 | 3.54 | 3.08 | 0.48 | 7.97 | 12.53          | 11.68 | -    | 1.94  | 6.15 | 1.15 | 1.18       | -     |
| SCom                   | M | 43.5         | 0.72 | 3.48 | 1.36 | 0.62 | 5.75 | 19.85          | 3.92  | -    | 10.87 | 4.12 | 0.63 | 1.24       | -     |
|                        | F | 36.3         | 0.59 | 3.61 | 3.14 | 0.49 | 8.19 | 11.78          | 11.91 | -    | 11.16 | 6.27 | 1.17 | 1.21       | -     |
| <i>J. pygmaea</i>      |   |              |      |      |      |      |      |                |       |      |       |      |      |            |       |
| ClevA                  | M | 67.0         | 1.16 | 7.11 | 0.13 | 1.24 | 0.19 | 4.50           | 9.29  | 1.00 | 5.69  | -    | -    | -          | -     |
|                        | F | 53.0         | 1.39 | 4.25 | 0.17 | 0.96 | 0.24 | 17.60          | 5.27  | 0.43 | 11.55 | -    | -    | -          | -     |
| SCom                   | M | 65.4         | 1.19 | 7.25 | 0.14 | 1.27 | 0.20 | 4.58           | 9.47  | 1.02 | 5.81  | -    | -    | -          | -     |
|                        | F | 52.0         | 1.43 | 4.14 | 0.17 | 0.97 | 0.24 | 17.95          | 5.38  | 0.44 | 11.78 | -    | -    | -          | -     |

MH = monoterpenes hydrocarbons; OM = oxygenated monoterpenes; PhM = Phenolic monoterpenes; BM = Bicyclic monoterpenes; MOM = Monocyclic oxygenated monoterpenes; SH = sesquiterpenes hydrocarbons; OS = oxygenated sesquiterpenes; TOS = tricyclic oxygenated sesquiterpenes; BSH = bicyclic sesquiterpene hydrocarbons; OBS = oxygenated bicyclic sesquiterpenes; ASH = Acyclic sesquiterpenes hydrocarbons; D = diterpenes; OD = oxygenated diterpenes.
